# Supplementary material for: Genome Analysis and Antibiofilm Activity of Phage 590B against Multidrug-Resistant and Extensively Drug-Resistant Uropathogenic Escherichia coli Isolates, India
Source: MDPI journal article supplement (doi:10.3390/pathogens11121448), 2022-11-30
Supplement: s1 [file s1]

**Table S1:** Distribution of virulence genes among four host Uropathogenic *E. coli* isolates.

| Sr .No. | <i>E. coli</i> Strains | UTI-associated <i>E. coli</i> genes |     |      |      |      | Pathotype |
|---------|------------------------|-------------------------------------|-----|------|------|------|-----------|
|         |                        | hlyC                                | sfa | afaC | papC | fimH |           |
| 1       | 590                    | -                                   | -   | +    | +    | +    | UPEC      |
| 2       | 22895                  | +                                   | -   | +    | +    | +    | UPEC      |
| 3       | 43649                  | -                                   | -   | -    | +    | +    | UPEC      |
| 4       | 3919                   | +                                   | +   | -    | +    | +    | UPEC      |

**Table S2.** Functional annotation of phage 590B.

| ORF | Start | Stop | Directions | No. of residues | Functional annotation   | Identity (%)                                       | Color code |
|-----|-------|------|------------|-----------------|-------------------------|----------------------------------------------------|------------|
| 1   | 2     | 595  | +          | 197             | Terminase large subunit | 100% ( <i>Escherichia</i> phage vB_EcoS_XY2)       |            |
| 2   | 608   | 2089 | +          | 493             | Portal protein          | 100% ( <i>Escherichia</i> phage vB_EcoS_XY2)       |            |
| 3   | 2159  | 3202 | +          | 347             | Head protein            | 98.3% ( <i>Escherichia</i> phage vB_EcoS_XY2)      |            |
| 4   | 3202  | 3663 | +          | 153             | Putative tail protein   | 98% ( <i>Escherichia</i> phage ZCEC5)              |            |
| 5   | 3896  | 3693 | -          | 67              | hp                      | 43% ( <i>Salmonella</i> phage Shemara)             |            |
| 6   | 4272  | 4658 | +          | 128             | Putative spanin protein | 95.3% ( <i>Escherichia</i> phage vB_EcoS-Ro145clw) |            |

|    |      |      |   |     |                                        |                                                    |  |
|----|------|------|---|-----|----------------------------------------|----------------------------------------------------|--|
| 7  | 4850 | 5551 | + | 233 | Scaffold protein                       | 99.6% ( <i>Escherichia</i> phage vB_EcoS_XY1)      |  |
| 8  | 5554 | 6603 | + | 349 | Putative major capsid protein          | 99.7% ( <i>Escherichia</i> phage vB_EcoS_XY2)      |  |
| 9  | 6663 | 6962 | + | 99  | hp                                     | 94.9% ( <i>Escherichia</i> phage ST20)             |  |
| 10 | 6975 | 7328 | + | 117 | Ig-like domain-containing protein      | 88.9% ( <i>Escherichia</i> phage ST20)             |  |
| 11 | 7365 | 7544 | + | 59  | hp                                     | 100% ( <i>Escherichia</i> phage VB_EcoS-Golestan)  |  |
| 12 | 7548 | 8060 | + | 170 | hp                                     | 100% ( <i>Escherichia</i> phage VB_EcoS-Golestan)  |  |
| 13 | 8063 | 8677 | + | 204 | hp                                     | 96.1% ( <i>Escherichia</i> phage VB_EcoS-Golestan) |  |
| 14 | 8677 | 9036 | + | 119 | Head-to-tail connector complex protein | 96.6% ( <i>Escherichia</i> phage vB_EcoS_XY2)      |  |
| 15 | 9033 | 9533 | + | 166 | Putative tail protein                  | 98.8% ( <i>Escherichia</i> phage vB_EcoS_XY2)      |  |
| 16 | 9533 | 9946 | + | 137 | Tail protein                           | 98.5% ( <i>Raoultella</i> phage RP180)             |  |

|    |       |           |   |     |                                        |                                                    |  |
|----|-------|-----------|---|-----|----------------------------------------|----------------------------------------------------|--|
| 17 | 9949  | 1111<br>5 | + | 388 | Tail protein                           | 96.9% ( <i>Escherichia</i> phage vB_EcoS-Ro145clw) |  |
| 18 | 11374 | 1114<br>4 | - | 76  | hp                                     | 100% ( <i>Escherichia</i> phage vB_EcoS_HSE2)      |  |
| 19 | 11858 | 1138<br>8 | - | 156 | HNH<br>homing<br>endonuclea<br>se      | 98.1% ( <i>Escherichia</i> phage vB_EcoS-Ro145clw) |  |
| 20 | 13377 | 1305<br>1 | - | 108 | hp                                     | 99.1% ( <i>Escherichia</i> phage vB_EcoS_XY2)      |  |
| 21 | 13542 | 1395<br>8 | - | 138 | hp                                     | 100% ( <i>Escherichia</i> phage K1H)               |  |
| 22 | 14057 | 1432<br>0 | + | 87  | Tail<br>assembly<br>chaperone          | 100% ( <i>Escherichia</i> phage vB_EcoS_XY2)       |  |
| 23 | 14313 | 1662<br>5 | + | 770 | Putative<br>tape<br>measure<br>protein | 99.4% ( <i>Escherichia</i> phage vB_EcoS_XY2)      |  |
| 24 | 16625 | 1802<br>5 | + | 466 | Minor tail<br>protein                  | 98.9% ( <i>Escherichia</i> phage vB_EcoS_XY2)      |  |
| 25 | 18029 | 1854<br>4 | + | 171 | hp                                     | 98.8% ( <i>Escherichia</i> phage ZCEC5)            |  |
| 26 | 18541 | 1890<br>6 | + | 121 | hp                                     | 100% ( <i>Escherichia</i> phage P AB-2017)         |  |
| 27 | 18897 | 2146<br>4 | + | 855 | Putative tail<br>protein               | 98.6% ( <i>Escherichia</i> phage VB_EcoS-Golestan) |  |

|    |       |           |   |     |                                                   |                                                       |  |
|----|-------|-----------|---|-----|---------------------------------------------------|-------------------------------------------------------|--|
| 28 | 21477 | 2365<br>7 | + | 726 | Tail_spike_<br>N domain-<br>containing<br>protein | 93.5% ( <i>Escherichia</i> phage<br>vB_EcoS_XY2)      |  |
| 29 | 23823 | 2368<br>6 | - | 45  | hp                                                | 100% ( <i>Escherichia</i> phage P<br>AB-2017)         |  |
| 30 | 25244 | 2382<br>0 | - | 474 | DNA<br>helicase                                   | 98.1% ( <i>Escherichia</i> phage<br>vB_EcoS_fTaEco01) |  |
| 31 | 26031 | 2523<br>7 | - | 264 | putative C-<br>specific<br>methylase              | 85.8% ( <i>Escherichia</i> phage<br>vB_EcoS_fKuEco01) |  |
| 32 | 26219 | 2602<br>8 | - | 63  | hp                                                | 100% ( <i>Salmonella</i> phage<br>SS1)                |  |
| 33 | 26538 | 2620<br>3 | - | 110 | VRR-NUC<br>domain<br>protein                      | 96.3% ( <i>Escherichia</i> phage<br>vB_EcoS_XY2)      |  |
| 34 | 26751 | 2662<br>0 | - | 43  | hp                                                | 100% ( <i>Escherichia</i> phage<br>VB_EcoS-Golestan)  |  |
| 35 | 26623 | 2652<br>5 | - | 32  | hp                                                | 100% ( <i>Escherichia</i> phage<br>VB_EcoS-Golestan)  |  |
| 36 | 28924 | 2674<br>1 | - | 727 | DNA<br>polymerase<br>I                            | 97.9% ( <i>Escherichia</i> phage<br>G AB-2017)        |  |
| 37 | 29199 | 2892<br>1 | - | 92  | hp                                                | 100% ( <i>Escherichia</i> phage<br>VB_EcoS-Golestan)  |  |

|    |       |           |   |     |                                 |                                                    |  |
|----|-------|-----------|---|-----|---------------------------------|----------------------------------------------------|--|
| 38 | 29888 | 2925<br>9 | - | 209 | Helix-destabilizing protein     | 99.5% ( <i>Escherichia</i> phage vB_EcoS_HSE2)     |  |
| 39 | 30164 | 2996<br>1 | - | 67  | hp                              | 98.5% ( <i>Escherichia</i> phage VB_EcoS-Golestan) |  |
| 40 | 31402 | 3016<br>1 | - | 413 | nuclease superfamily protein    | 96.6% ( <i>Escherichia</i> phage G AB-2017)        |  |
| 41 | 31671 | 3139<br>9 | - | 90  | hp                              | 91.1% ( <i>Raoultella</i> phage RP180)             |  |
| 42 | 32215 | 3171<br>5 | - | 166 | 13.88 kDa late protein          | 97% ( <i>Escherichia</i> phage vB_EcoS_XY1)        |  |
| 43 | 32340 | 3255<br>5 | - | 71  | Transcriptional repressor DicA  | 100% ( <i>Escherichia</i> phage G AB-2017)         |  |
| 44 | 34795 | 3257<br>3 | - | 740 | Replicative helicase/pri mase   | 99.6% ( <i>Escherichia</i> phage vB_EcoS_XY2)      |  |
| 45 | 34920 | 3479<br>2 | - | 42  | hp                              | 100% ( <i>Escherichia</i> phage vB_EcoS_fKuEco01)  |  |
| 46 | 35280 | 3499<br>0 | - | 96  | hp                              | 100 % ( <i>Escherichia</i> phage vB_EcoS_XY2)      |  |
| 47 | 35459 | 3527<br>7 | - | 60  | Helix-turn-helix domain protein | 100% ( <i>Escherichia</i> phage vB_EcoS_fKuEco01)  |  |

|    |       |           |   |     |                                     |                                                    |  |
|----|-------|-----------|---|-----|-------------------------------------|----------------------------------------------------|--|
| 48 | 35884 | 3573<br>2 | - | 50  | hp                                  | 26.7% ( <i>Clostridium bornimense</i> )            |  |
| 49 | 35942 | 3613<br>3 | - | 63  | hp                                  | 93.7% ( <i>Escherichia</i> phage vB_EcoS_XY2)      |  |
| 50 | 36133 | 3642<br>6 | + | 97  | hp                                  | 33% ( <i>Salmonella</i> phage TS6)                 |  |
| 51 | 36423 | 3662<br>0 | + | 65  | hp                                  | 83.6% ( <i>Raoultella</i> phage RP180)             |  |
| 52 | 36617 | 3677<br>2 | + | 51  | hp                                  | 100% ( <i>Escherichia</i> phage vB_EcoS_fKuEco01)  |  |
| 53 | 36765 | 3696<br>5 | + | 66  | HP DUF551 domain-containing protein | 98.5% ( <i>Escherichia</i> phage vB_EcoS_fKuEco01) |  |
| 54 | 37173 | 3730<br>1 | + | 42  | hp                                  | 97.6% ( <i>Escherichia</i> phage vB_EcoS_fTaEco01) |  |
| 55 | 37291 | 3747<br>9 | + | 62  | hp                                  | 88.7% ( <i>Escherichia</i> phage vB_EcoS_fFiEco02) |  |
| 56 | 37476 | 3785<br>3 | + | 125 | hp                                  | 91.4% ( <i>Escherichia</i> phage P AB-2017)        |  |
| 57 | 37855 | 3805<br>8 | + | 67  | hp                                  | 91.0% ( <i>Escherichia</i> phage vB_EcoS_fFiEco02) |  |
| 58 | 38058 | 3832<br>7 | + | 89  | hp                                  | 98.9 % ( <i>Escherichia</i> phage vB_EcoS_XY2)     |  |

|    |       |           |   |     |                              |                                                     |  |
|----|-------|-----------|---|-----|------------------------------|-----------------------------------------------------|--|
| 59 | 38327 | 3857<br>8 | + | 83  | hp                           | 74.0 % ( <i>Escherichia</i> phage vB_EcoS_fKuEco01) |  |
| 60 | 38562 | 3885<br>5 | + | 97  | hp                           | 100 % ( <i>Escherichia</i> phage vB_EcoS_XY2)       |  |
| 61 | 38852 | 3929<br>2 | + | 146 | ATP-dependent protease       | 99.3% ( <i>Escherichia</i> phage vB_EcoS_XY2)       |  |
| 62 | 39352 | 3966<br>0 | + | 102 | Putative holin-like class II | 99% ( <i>Escherichia</i> phage vB_EcoS-Ro145clw)    |  |
| 63 | 39653 | 3992<br>5 | + | 90  | Class I holin-like protein   | 100% ( <i>Escherichia</i> phage ZCEC5)              |  |
| 64 | 39903 | 4039<br>1 | + | 162 | endolysin                    | 97.5% ( <i>Escherichia</i> phage vB_EcoS_fFiEco02)  |  |
| 65 | 40575 | 4076<br>3 | + | 62  | hp                           | 79% ( <i>Escherichia</i> phage vB_EcoS_fFiEco02)    |  |
| 66 | 40760 | 4090<br>9 | + | 49  | hp                           | 98% ( <i>Escherichia</i> phage vB_EcoS_XY2)         |  |
| 67 | 40906 | 4110<br>3 | + | 65  | hp                           | 98.5% ( <i>Escherichia</i> phage vB_EcoS_XY2)       |  |
| 68 | 41100 | 4126<br>1 | + | 53  | hp                           | 100%( <i>Escherichia</i> phage vB_EcoS_XY2)         |  |
| 69 | 41254 | 4143<br>9 | + | 61  | hp                           | 100% ( <i>Escherichia</i> phage VB_EcoS-Golestan)   |  |

|    |       |           |   |     |                                  |                                                   |  |
|----|-------|-----------|---|-----|----------------------------------|---------------------------------------------------|--|
| 70 | 41432 | 4173<br>1 | + | 99  | hp                               | 98.0% ( <i>Escherichia</i> phage vB_EcoS_XY2)     |  |
| 71 | 41718 | 4181<br>3 | + | 31  | hp                               | 93.5% ( <i>Escherichia</i> phage vB_EcoS_XY2)     |  |
| 72 | 41988 | 4215<br>8 | + | 56  | hp                               | 100% ( <i>Escherichia</i> phage vB_EcoS_fKuEco01) |  |
| 73 | 42155 | 4239<br>1 | + | 78  | Transcriptio<br>nal<br>regulator | 100% ( <i>Escherichia</i> phage vB_EcoS_HSE2)     |  |
| 74 | 42388 | 4254<br>3 | + | 51  | hp                               | 100% ( <i>Escherichia</i> phage vB_EcoS_XY2)      |  |
| 75 | 42671 | 4318<br>0 | + | 169 | Terminase<br>small<br>subunit    | 99.4% ( <i>Escherichia</i> phage vB_EcoS_XY2)     |  |
|    |       |           |   |     |                                  | Replication/metabolism                            |  |
|    |       |           |   |     |                                  | Structural and proteins                           |  |
|    |       |           |   |     |                                  | Lysis proteins                                    |  |
|    |       |           |   |     |                                  | Packaging proteins                                |  |
|    |       |           |   |     |                                  | Hypothetical proteins<br>(hp)                     |  |

**Table S3:** The relationship of the five phages (*Escherichia* phage 590B, *Escherichia* phage vB EcoS XY2, *Escherichia* phage VB EcoS-Golestan, *Escherichia* phage phiWAO78-1, and *Escherichia* phage NTEC3) at the protein level using CoreGenes3.5.

|                                                                                                                                                 |
|-------------------------------------------------------------------------------------------------------------------------------------------------|
| <p>The number of homologs in each column is :47<br/> Total number of genes in genome 1: 75<br/> % in common, with respect to genome 1:62.67</p> |
|-------------------------------------------------------------------------------------------------------------------------------------------------|



|                                                                                                                                                                                                                                                                                                                                                              |                                                                                  |                                                                                        |                                                                                  |                                                                                  |
|--------------------------------------------------------------------------------------------------------------------------------------------------------------------------------------------------------------------------------------------------------------------------------------------------------------------------------------------------------------|----------------------------------------------------------------------------------|----------------------------------------------------------------------------------------|----------------------------------------------------------------------------------|----------------------------------------------------------------------------------|
| Total number of genes in genome 2 :73<br>% in common, with respect to genome 2 :64.38<br>Total number of genes in genome 3:78<br>% in common, with respect to genome 3:60.26<br>Total number of genes in genome 4: 83<br>% in common, with respect to genome 4 :56.63<br>Total number of genes in genome 5:72<br>% in common, with respect to genome 5:65.28 |                                                                                  |                                                                                        |                                                                                  |                                                                                  |
| <b><i>Escherichia</i><br/>phage 590B<br/><a href="#">MW722821</a></b>                                                                                                                                                                                                                                                                                        | <b><i>Escherichia</i><br/>phage<br/>vB_EcoS_XY2<br/><a href="#">MN927226</a></b> | <b><i>Escherichia</i><br/>phage VB_EcoS-<br/>Golestan<br/><a href="#">MG099933</a></b> | <b><i>Escherichia</i><br/>phage<br/>phiWAO78-1<br/><a href="#">MW331437</a></b>  | <b><i>Escherichia</i><br/>phage NTEC3<br/><a href="#">OK539620</a></b>           |
| PI: <a href="#">QVR48582.1</a><br>PRODUCT:terminase large subunit                                                                                                                                                                                                                                                                                            | PI: <a href="#">QIG59325.1</a><br>PRODUCT:terminase large subunit                | PI: <a href="#">ATS93225.1</a><br>PRODUCT:putative terminase large subunit             | PI: <a href="#">QQV88022.1</a><br>PRODUCT:terminase large subunit                | PI: <a href="#">UDG73250.1</a><br>PRODUCT:terminase large subunit                |
| PI: <a href="#">QVR48583.1</a><br>PRODUCT:portal protein                                                                                                                                                                                                                                                                                                     | PI: <a href="#">QIG59324.1</a><br>PRODUCT:portal protein                         | PI: <a href="#">ATS93226.1</a><br>PRODUCT:putative structural protein                  | PI: <a href="#">QQV88024.1</a><br>PRODUCT:portal protein                         | PI: <a href="#">UDG73249.1</a><br>PRODUCT:62 kDa structural protein              |
| PI: <a href="#">QVR48584.1</a><br>PRODUCT:head protein                                                                                                                                                                                                                                                                                                       | PI: <a href="#">QIG59323.1</a><br>PRODUCT:head protein                           | PI: <a href="#">ATS93227.1</a><br>PRODUCT:hypothetical protein                         | PI: <a href="#">QQV88027.1</a><br>PRODUCT:head morphogenesis protein             | PI: <a href="#">UDG73248.1</a><br>PRODUCT:head protein                           |
| PI: <a href="#">QVR48585.1</a><br>PRODUCT:putative tail protein                                                                                                                                                                                                                                                                                              | PI: <a href="#">QIG59322.1</a><br>PRODUCT:tail protein                           | PI: <a href="#">ATS93228.1</a><br>PRODUCT:putative tail protein                        | PI: <a href="#">QQV88026.1</a><br>PRODUCT:tail protein                           | PI: <a href="#">UDG73247.1</a><br>PRODUCT:fibrin protein                         |
| PI: <a href="#">QVR48586.1</a><br>PRODUCT:putative spanin protein                                                                                                                                                                                                                                                                                            | PI: <a href="#">QIG59320.1</a><br>PRODUCT:putative spanin                        | PI: <a href="#">ATS93231.1</a><br>PRODUCT:putative spanin                              | PI: <a href="#">QQV88030.1</a><br>PRODUCT:putative spanin                        | PI: <a href="#">UDG73245.1</a><br>PRODUCT:putative spanin protein                |
| PI: <a href="#">QVR48587.1</a><br>PRODUCT:scaffold protein                                                                                                                                                                                                                                                                                                   | PI: <a href="#">QIG59318.1</a><br>PRODUCT:scaffold protein                       | PI: <a href="#">ATS93233.1</a><br>PRODUCT:hypothetical protein                         | PI: <a href="#">QQV88034.1</a><br>PRODUCT:scaffold protein                       | PI: <a href="#">UDG73244.1</a><br>PRODUCT:scaffold protein                       |
| PI: <a href="#">QVR48590.1</a><br>PRODUCT:Ig-like domain-containing protein                                                                                                                                                                                                                                                                                  | PI: <a href="#">QIG59315.1</a><br>PRODUCT:capsid decoration protein              | PI: <a href="#">ATS93235.1</a><br>PRODUCT:hypothetical protein                         | PI: <a href="#">QQV88037.1</a><br>PRODUCT:capsid decoration protein              | PI: <a href="#">UDG73242.1</a><br>PRODUCT:neck whiskers protein                  |
| PI: <a href="#">QVR48591.1</a><br>PRODUCT:hypothetical protein                                                                                                                                                                                                                                                                                               | PI: <a href="#">QIG59314.1</a><br>PRODUCT:head-tail joining protein              | PI: <a href="#">ATS93236.1</a><br>PRODUCT:hypothetical protein                         | PI: <a href="#">QQV88038.1</a><br>PRODUCT:head-to-tail joining protein           | PI: <a href="#">UDG73241.1</a><br>PRODUCT:hypothetical protein                   |
| PI: <a href="#">QVR48592.1</a><br>PRODUCT:hypothetical protein                                                                                                                                                                                                                                                                                               | PI: <a href="#">QIG59313.1</a><br>PRODUCT:head-to-tail connector complex protein | PI: <a href="#">ATS93237.1</a><br>PRODUCT:hypothetical protein                         | PI: <a href="#">QQV88039.1</a><br>PRODUCT:head-to-tail connector complex protein | PI: <a href="#">UDG73240.1</a><br>PRODUCT:head-to-tail connector complex protein |
| PI: <a href="#">QVR48594.1</a><br>PRODUCT:head-to-tail connector complex                                                                                                                                                                                                                                                                                     | PI: <a href="#">QIG59311.1</a><br>PRODUCT:head-to-tail connector                 | PI: <a href="#">ATS93239.1</a><br>PRODUCT:hypothetical protein                         | PI: <a href="#">QQV88041.1</a><br>PRODUCT:head-to-tail connector complex protein | PI: <a href="#">UDG73311.1</a><br>PRODUCT:head-to-tail connector                 |

|                                                                                  |                                                                         |                                                                         |                                                                              |                                                                     |
|----------------------------------------------------------------------------------|-------------------------------------------------------------------------|-------------------------------------------------------------------------|------------------------------------------------------------------------------|---------------------------------------------------------------------|
|                                                                                  | complex protein                                                         |                                                                         |                                                                              |                                                                     |
| PI: <a href="#">QVR48595.1</a><br>PRODUCT:putative tail protein                  | PI: <a href="#">QIG59310.1</a><br>PRODUCT:putative tail protein         | PI: <a href="#">ATS93240.1</a><br>PRODUCT:putative tail protein         | PI: <a href="#">QOV88042.1</a><br>PRODUCT:tail protein                       | PI: <a href="#">UDG73310.1</a><br>PRODUCT:tail protein              |
| PI: <a href="#">QVR48596.1</a><br>PRODUCT:tail protein                           | PI: <a href="#">QIG59309.1</a><br>PRODUCT:tail protein                  | PI: <a href="#">ATS93241.1</a><br>PRODUCT:hypothetical protein          | PI: <a href="#">QOV88043.1</a><br>PRODUCT:tail protein                       | PI: <a href="#">UDG73309.1</a><br>PRODUCT:tail protein              |
| PI: <a href="#">QVR48597.1</a><br>PRODUCT:tail protein                           | PI: <a href="#">QIG59308.1</a><br>PRODUCT:putative tail protein         | PI: <a href="#">ATS93242.1</a><br>PRODUCT:putative tail protein         | PI: <a href="#">QOV88044.1</a><br>PRODUCT:tail tube protein                  | PI: <a href="#">UDG73308.1</a><br>PRODUCT:putative tail protein     |
| PI: <a href="#">QVR48598.1</a><br>PRODUCT:hypothetical protein                   | PI: <a href="#">QIG59304.1</a><br>PRODUCT:tail assembly chaperone       | PI: <a href="#">ATS93247.1</a><br>PRODUCT:hypothetical protein          | PI: <a href="#">QOV88049.1</a><br>PRODUCT:tail assembly chaperone            | PI: <a href="#">UDG73303.1</a><br>PRODUCT:hypothetical protein      |
| PI: <a href="#">QVR48599.1</a><br>PRODUCT:tail assembly chaperone                | PI: <a href="#">QIG59303.1</a><br>PRODUCT:tail assembly chaperone       | PI: <a href="#">ATS93248.1</a><br>PRODUCT:hypothetical protein          | PI: <a href="#">QOV88050.1</a><br>PRODUCT:hypothetical protein               | PI: <a href="#">UDG73302.1</a><br>PRODUCT:hypothetical protein      |
| PI: <a href="#">QVR48600.1</a><br>PRODUCT:putative tape measure protein          | PI: <a href="#">QIG59302.1</a><br>PRODUCT:putative tape measure protein | PI: <a href="#">ATS93249.1</a><br>PRODUCT:putative tape measure protein | PI: <a href="#">QOV88051.1</a><br>PRODUCT:putative tail tape measure protein | PI: <a href="#">UDG73301.1</a><br>PRODUCT:tail tape measure protein |
| PI: <a href="#">QVR48601.1</a><br>PRODUCT:minor tail protein                     | PI: <a href="#">QIG59301.1</a><br>PRODUCT:minor tail protein            | PI: <a href="#">ATS93250.1</a><br>PRODUCT:hypothetical protein          | PI: <a href="#">QOV88052.1</a><br>PRODUCT:minor tail protein                 | PI: <a href="#">UDG73300.1</a><br>PRODUCT:hypothetical protein      |
| PI: <a href="#">QVR48602.1</a><br>PRODUCT:hypothetical protein                   | PI: <a href="#">QIG59300.1</a><br>PRODUCT:transcriptional regulator     | PI: <a href="#">ATS93251.1</a><br>PRODUCT:hypothetical protein          | PI: <a href="#">QOV88053.1</a><br>PRODUCT:enolase-like protein               | PI: <a href="#">UDG73299.1</a><br>PRODUCT:hypothetical protein      |
| PI: <a href="#">QVR48603.1</a><br>PRODUCT:hypothetical protein                   | PI: <a href="#">QIG59299.1</a><br>PRODUCT:peptidoglycan endopeptidase   | PI: <a href="#">ATS93252.1</a><br>PRODUCT:hypothetical protein          | PI: <a href="#">QOV88054.1</a><br>PRODUCT:peptidoglycan endopeptidase        | PI: <a href="#">UDG73298.1</a><br>PRODUCT:hypothetical protein      |
| PI: <a href="#">QVR48604.1</a><br>PRODUCT:putative tail protein                  | PI: <a href="#">QIG59298.1</a><br>PRODUCT:putative tail protein         | PI: <a href="#">ATS93253.1</a><br>PRODUCT:putative tail protein         | PI: <a href="#">QOV88055.1</a><br>PRODUCT:putative tail fiber protein        | PI: <a href="#">UDG73297.1</a><br>PRODUCT:tail protein              |
| PI: <a href="#">QVR48605.1</a><br>PRODUCT:tail spike N domain-containing protein | PI: <a href="#">QIG59297.1</a><br>PRODUCT:hypothetical protein          | PI: <a href="#">ATS93254.1</a><br>PRODUCT:tail fibers protein           | PI: <a href="#">QOV88057.1</a><br>PRODUCT:tail spike protein                 | PI: <a href="#">UDG73296.1</a><br>PRODUCT:tail spike protein        |
| PI: <a href="#">UCR96559.1</a><br>PRODUCT:hypothetical protein                   | PI: <a href="#">QIG59296.1</a><br>PRODUCT:exonuclease subunit           | PI: <a href="#">ATS93255.1</a><br>PRODUCT:exonuclease subunit           | PI: <a href="#">QOV88056.1</a><br>PRODUCT:exonuclease subunit                | PI: <a href="#">UDG73295.1</a><br>PRODUCT:hypothetical protein      |

|                                                                                  |                                                                                                |                                                                                          |                                                                                                |                                                                               |
|----------------------------------------------------------------------------------|------------------------------------------------------------------------------------------------|------------------------------------------------------------------------------------------|------------------------------------------------------------------------------------------------|-------------------------------------------------------------------------------|
| PI: <a href="#">UCR96560.1</a><br>PRODUCT:DNA<br>helicase                        | PI: <a href="#">QIG59295.1</a><br>PRODUCT:heli<br>case                                         | PI: <a href="#">ATS93257.1</a><br>PRODUCT:helicase                                       | PI: <a href="#">QQV88059.1</a><br>PRODUCT:ATP-<br>dependent helicase                           | PI: <a href="#">UDG73294.1</a><br>PRODUCT:DNA<br>helicase                     |
| PI: <a href="#">UCR96562.1</a><br>PRODUCT:hypot<br>hetical protein               | PI: <a href="#">QIG59293.1</a><br>PRODUCT:hyp<br>othetical<br>protein                          | PI: <a href="#">ATS93259.1</a><br>PRODUCT:hypoth<br>etical protein                       | PI: <a href="#">QQV88062.1</a><br>PRODUCT:hypoth<br>etical protein                             | PI: <a href="#">UDG73292.1</a><br>PRODUCT:hypoth<br>etical protein            |
| PI: <a href="#">UCR96563.1</a><br>PRODUCT:VRR-<br>NUC domain<br>protein          | PI: <a href="#">QIG59292.1</a><br>PRODUCT:VR<br>R-NUC domain<br>protein                        | PI: <a href="#">ATS93260.1</a><br>PRODUCT:VRR-<br>NUC domain<br>protein                  | PI: <a href="#">QQV88063.1</a><br>PRODUCT:endonu<br>clease                                     | PI: <a href="#">UDG73291.1</a><br>PRODUCT:endonu<br>clease protein            |
| PI: <a href="#">UCR96564.1</a><br>PRODUCT:hypot<br>hetical protein               | PI: <a href="#">QIG59290.1</a><br>PRODUCT:hyp<br>othetical<br>protein                          | PI: <a href="#">ATS93262.1</a><br>PRODUCT:hypoth<br>etical protein                       | PI: <a href="#">QQV88067.1</a><br>PRODUCT:hypoth<br>etical protein                             | PI: <a href="#">UDG73289.1</a><br>PRODUCT:hypoth<br>etical protein            |
| PI: <a href="#">UCR96566.1</a><br>PRODUCT:DNA<br>polymerase I                    | PI: <a href="#">QIG59288.1</a><br>PRODUCT:DN<br>A polymerase                                   | PI: <a href="#">ATS93263.1</a><br>PRODUCT:putativ<br>e DNA polymerase                    | PI: <a href="#">QQV88068.1</a><br>PRODUCT:thermos<br>table DNA<br>polymerase I                 | PI: <a href="#">UDG73288.1</a><br>PRODUCT:DNA<br>polymerase I                 |
| PI: <a href="#">UCR96568.1</a><br>PRODUCT:helix-<br>destabilizing<br>protein     | PI: <a href="#">QIG59287.1</a><br>PRODUCT:heli<br>x-destabilizing<br>protein                   | PI: <a href="#">ATS93265.1</a><br>PRODUCT:hypoth<br>etical protein                       | PI: <a href="#">QQV88069.1</a><br>PRODUCT:helix-<br>destabilizing<br>protein                   | PI: <a href="#">UDG73287.1</a><br>PRODUCT:hypoth<br>etical protein            |
| PI: <a href="#">UCR96570.1</a><br>PRODUCT:nuclea<br>se superfamily<br>protein    | PI: <a href="#">QIG59285.1</a><br>PRODUCT:PD-<br>(D/E)XK<br>nuclease<br>superfamily<br>protein | PI: <a href="#">ATS93267.1</a><br>PRODUCT:PD-<br>(D/E)XK nuclease<br>superfamily protein | PI: <a href="#">QQV88071.1</a><br>PRODUCT:PD-<br>(D/E)XK nuclease<br>superfamily protein       | PI: <a href="#">UDG73285.1</a><br>PRODUCT:nucleas<br>e superfamily<br>protein |
| PI: <a href="#">UCR96571.1</a><br>PRODUCT:hypot<br>hetical protein               | PI: <a href="#">QIG59284.1</a><br>PRODUCT:hyp<br>othetical<br>protein                          | PI: <a href="#">ATS93269.1</a><br>PRODUCT:hypoth<br>etical protein                       | PI: <a href="#">QQV88072.1</a><br>PRODUCT:hypoth<br>etical protein                             | PI: <a href="#">UDG73284.1</a><br>PRODUCT:hypoth<br>etical protein            |
| PI: <a href="#">UCR96572.1</a><br>PRODUCT:13.88<br>kDa late protein              | PI: <a href="#">QIG59283.1</a><br>PRODUCT:13.8<br>8 kDa late<br>protein                        | PI: <a href="#">ATS93270.1</a><br>PRODUCT:hypoth<br>etical protein                       | PI: <a href="#">QQV88074.1</a><br>PRODUCT:hypoth<br>etical protein                             | PI: <a href="#">UDG73283.1</a><br>PRODUCT:hypoth<br>etical protein            |
| PI: <a href="#">QVR48606.1</a><br>PRODUCT:transc<br>riptional repressor          | PI: <a href="#">QIG59282.1</a><br>PRODUCT:tran<br>scriptional<br>repressor                     | PI: <a href="#">ATS93272.1</a><br>PRODUCT:transcri<br>ptional repressor                  | PI: <a href="#">QQV88075.1</a><br>PRODUCT:helix-<br>trun-helix<br>transcriptional<br>regulator | PI: <a href="#">UDG73282.1</a><br>PRODUCT:hypoth<br>etical protein            |
| PI: <a href="#">UCR96573.1</a><br>PRODUCT:replica<br>tive DNA helicase           | PI: <a href="#">QIG59281.1</a><br>PRODUCT:repl<br>icative<br>helicase/primas<br>e              | PI: <a href="#">ATS93274.1</a><br>PRODUCT:putativ<br>e replicative<br>helicase/primease  | PI: <a href="#">QQV88076.1</a><br>PRODUCT:putativ<br>e helicase-primase                        | PI: <a href="#">UDG73281.1</a><br>PRODUCT:DNA<br>helicase                     |
| PI: <a href="#">UCR96575.1</a><br>PRODUCT:helix-<br>turn-helix domain<br>protein | PI: <a href="#">QIG59278.1</a><br>PRODUCT:heli<br>x-turn-helix<br>domain protein               | PI: <a href="#">ATS93277.1</a><br>PRODUCT:helix-<br>turn-helix domain<br>protein         | PI: <a href="#">QQV88078.1</a><br>PRODUCT:helix-<br>turn-helix domain-<br>containing protein   | PI: <a href="#">UDG73279.1</a><br>PRODUCT:hypoth<br>etical protein            |

|                                                                      |                                                                      |                                                                               |                                                                      |                                                                   |
|----------------------------------------------------------------------|----------------------------------------------------------------------|-------------------------------------------------------------------------------|----------------------------------------------------------------------|-------------------------------------------------------------------|
| PI: <a href="#">QVR48607.1</a><br>PRODUCT:hypothetical protein       | PI: <a href="#">QIG59277.1</a><br>PRODUCT:hypothetical protein       | PI: <a href="#">ATS93278.1</a><br>PRODUCT:hypothetical protein                | PI: <a href="#">QQV88079.1</a><br>PRODUCT:hypothetical protein       | PI: <a href="#">UDG73277.1</a><br>PRODUCT:hypothetical protein    |
| PI: <a href="#">QVR48610.1</a><br>PRODUCT:hypothetical protein       | PI: <a href="#">QIG59273.1</a><br>PRODUCT:hypothetical protein       | PI: <a href="#">ATS93281.1</a><br>PRODUCT:hypothetical protein                | PI: <a href="#">QQV88083.1</a><br>PRODUCT:hypothetical protein       | PI: <a href="#">UDG73274.1</a><br>PRODUCT:hypothetical protein    |
| PI: <a href="#">QVR48614.1</a><br>PRODUCT:hypothetical protein       | PI: <a href="#">QIG59269.1</a><br>PRODUCT:hypothetical protein       | PI: <a href="#">ATS93284.1</a><br>PRODUCT:hypothetical protein                | PI: <a href="#">QQV88086.1</a><br>PRODUCT:hypothetical protein       | PI: <a href="#">UDG73268.1</a><br>PRODUCT:hypothetical protein    |
| PI: <a href="#">QVR48618.1</a><br>PRODUCT:hypothetical protein       | PI: <a href="#">QIG59339.1</a><br>PRODUCT:hypothetical protein       | PI: <a href="#">ATS93289.1</a><br>PRODUCT:hypothetical protein                | PI: <a href="#">QQV88089.1</a><br>PRODUCT:hypothetical protein       | PI: <a href="#">UDG73265.1</a><br>PRODUCT:hypothetical protein    |
| PI: <a href="#">QVR48621.1</a><br>PRODUCT:class I holin-like protein | PI: <a href="#">QIG59336.1</a><br>PRODUCT:class I holin-like protein | PI: <a href="#">ATS93291.1</a><br>PRODUCT:putative class I holin-like protein | PI: <a href="#">QQV88090.1</a><br>PRODUCT:class I holin-like protein | PI: <a href="#">UDG73262.1</a><br>PRODUCT:hypothetical protein    |
| PI: <a href="#">QVR48622.1</a><br>PRODUCT:endolysin                  | PI: <a href="#">QIG59335.1</a><br>PRODUCT:putative endolysin         | PI: <a href="#">ATS93292.1</a><br>PRODUCT:lysozyme/endolysin                  | PI: <a href="#">QQV88091.1</a><br>PRODUCT:lysozyme                   | PI: <a href="#">UDG73261.1</a><br>PRODUCT:endolysin               |
| PI: <a href="#">QVR48624.1</a><br>PRODUCT:hypothetical protein       | PI: <a href="#">QIG59334.1</a><br>PRODUCT:hypothetical protein       | PI: <a href="#">ATS93293.1</a><br>PRODUCT:hypothetical protein                | PI: <a href="#">QQV88093.1</a><br>PRODUCT:hypothetical protein       | PI: <a href="#">UDG73260.1</a><br>PRODUCT:head protein            |
| PI: <a href="#">QVR48626.1</a><br>PRODUCT:hypothetical protein       | PI: <a href="#">QIG59332.1</a><br>PRODUCT:hypothetical protein       | PI: <a href="#">ATS93295.1</a><br>PRODUCT:hypothetical protein                | PI: <a href="#">QQV88096.1</a><br>PRODUCT:DUF2737 family protein     | PI: <a href="#">UDG73259.1</a><br>PRODUCT:hypothetical protein    |
| PI: <a href="#">QVR48627.1</a><br>PRODUCT:hypothetical protein       | PI: <a href="#">QIG59331.1</a><br>PRODUCT:Nin protein                | PI: <a href="#">ATS93296.1</a><br>PRODUCT:hypothetical protein                | PI: <a href="#">QQV88097.1</a><br>PRODUCT:hypothetical protein       | PI: <a href="#">UDG73258.1</a><br>PRODUCT:hypothetical protein    |
| PI: <a href="#">QVR48628.1</a><br>PRODUCT:hypothetical protein       | PI: <a href="#">QIG59330.1</a><br>PRODUCT:hypothetical protein       | PI: <a href="#">ATS93297.1</a><br>PRODUCT:hypothetical protein                | PI: <a href="#">QQV88098.1</a><br>PRODUCT:hypothetical protein       | PI: <a href="#">UDG73257.1</a><br>PRODUCT:hypothetical protein    |
| PI: <a href="#">QVR48629.1</a><br>PRODUCT:hypothetical protein       | PI: <a href="#">QIG59329.1</a><br>PRODUCT:hypothetical protein       | PI: <a href="#">ATS93298.1</a><br>PRODUCT:hypothetical protein                | PI: <a href="#">QQV88099.1</a><br>PRODUCT:hypothetical protein       | PI: <a href="#">UDG73256.1</a><br>PRODUCT:hypothetical protein    |
| PI: <a href="#">QVR48631.1</a><br>PRODUCT:hypothetical protein       | PI: <a href="#">QIG59328.1</a><br>PRODUCT:transcriptional regulator  | PI: <a href="#">ATS93300.1</a><br>PRODUCT:hypothetical protein                | PI: <a href="#">QQV88102.1</a><br>PRODUCT:NinH protein               | PI: <a href="#">UDG73254.1</a><br>PRODUCT:hypothetical protein    |
| PI: <a href="#">QVR48633.1</a><br>PRODUCT:terminase small subunit    | PI: <a href="#">QIG59326.1</a><br>PRODUCT:terminase small subunit    | PI: <a href="#">ATS93302.1</a><br>PRODUCT:putative terminase small subunit    | PI: <a href="#">QQV88023.1</a><br>PRODUCT:small subunit of terminase | PI: <a href="#">UDG73251.1</a><br>PRODUCT:terminase small subunit |

**Table S4:** Antibiotic sensitivity, the serotyping profile of 50 MDR Uropathogenic E. coli panel strains and host range testing of phage 590B using spot assay.

| Sr.No. | Strain name | Cefotaxime | Cefoparazone | Gentamycin | Amikacin | Nalidixic acid | Norfloxacin | Ciprofloxacin | Nitrofurantoin | Imipenem | Cotrimoxazole | Cefoparazone+sulbactam | Colistin | Serotypes | Phage 590B activity |
|--------|-------------|------------|--------------|------------|----------|----------------|-------------|---------------|----------------|----------|---------------|------------------------|----------|-----------|---------------------|
| 1      | 30608       | R          | R            | R          | R        | R              | R           | R             | S              | I        | R             | R                      | S        | O20       | -                   |
| 2      | 43836       | R          | R            | R          | R        | R              | R           | R             | S              | R        | R             | R                      | S        | O04       | -                   |
| 3      | 590         | R          | R            | R          | R        | R              | R           | R             | S              | I        | R             | R                      | S        | O20       | ++                  |
| 4      | 40329       | S          | R            | S          | R        | R              | S           | R             | S              | I        | R             | R                      | S        | O83       | -                   |
| 5      | 38036       | R          | R            | R          | R        | R              | R           | R             | R              | I        | R             | R                      | R        | O49       | -                   |
| 6      | 15286       | R          | R            | R          | R        | R              | R           | R             | S              | R        | R             | R                      | S        | O135      | -                   |
| 7      | 39937       | R          | R            | R          | R        | R              | R           | R             | R              | R        | R             | R                      | S        | O101      | -                   |
| 8      | 1184        | R          | R            | R          | R        | R              | R           | R             | S              | R        | R             | R                      | S        | UT        | -                   |
| 9      | 180         | R          | R            | R          | R        | R              | R           | R             | R              | R        | R             | R                      | S        | UT        | -                   |
| 10     | 22895       | R          | R            | R          | S        | R              | R           | R             | R              | S        | R             | R                      | S        | O149      | ++                  |
| 11     | 43181       | R          | R            | R          | R        | R              | R           | R             | S              | R        | R             | R                      | S        | O26       | -                   |
| 12     | 531         | R          | R            | R          | S        | R              | R           | R             | S              | I        | R             | R                      | S        | UT        | -                   |
| 13     | AN11.3      | R          | R            | S          | R        | R              | R           | R             | S              | R        | R             | R                      | S        | O101      | -                   |
| 14     | 32797       | R          | R            | R          | R        | R              | R           | R             | S              | R        | R             | R                      | S        | O120      | -                   |
| 15     | 24331       | R          | R            | R          | R        | R              | R           | R             | I              | R        | R             | R                      | S        | O8        | -                   |
| 16     | 33448       | R          | R            | R          | R        | R              | R           | R             | R              | I        | R             | R                      | R        | UT        | -                   |

[illegible]

|        |       |   |   |   |   |   |   |   |   |   |   |   |   |      |   |
|--------|-------|---|---|---|---|---|---|---|---|---|---|---|---|------|---|
| 3<br>2 | 38929 | S | R | R | R | R | S | R | S | R | R | R | S | O11  | - |
| 3<br>3 | 40354 | R | S | R | S | R | R | R | S | I | R | S | S | O120 | - |
| 3<br>4 | 44383 | R | R | R | R | S | R | R | R | R | R | R | S | O11  | - |
| 3<br>5 | 40314 | R | R | R | R | R | R | R | R | I | R | R | R | O8   | - |
| 3<br>6 | 191   | R | R | S | S | R | R | R | S | R | R | R | S | O128 | - |
| 3<br>7 | 22844 | R | R | S | S | R | R | R | R | S | R | R | S | O11  | - |
| 3<br>8 | 859   | R | R | R | S | R | R | R | S | I | R | R | S | O7   | - |
| 3<br>9 | 40036 | R | R | R | S | R | R | R | R | R | R | R | S | O149 | - |
| 4<br>0 | 41329 | R | R | R | R | R | R | R | R | R | R | S | S | O149 | - |
| 4<br>1 | 41677 | R | S | R | R | R | R | R | R | R | R | S | S | O14  | - |
| 4<br>2 | 33745 | R | R | R | R | R | R | R | R | R | R | S | S | O149 | - |
| 4<br>3 | 39677 | R | R | S | S | R | R | R | S | R | R | R | S | UT   | - |
| 4<br>4 | 39560 | R | R | R | R | R | R | R | R | R | R | R | S | O135 | - |
| 4<br>5 | 40670 | R | R | S | R | R | S | R | S | S | S | R | S | O135 | - |
| 4<br>6 | 39517 | R | R | R | R | R | R | R | S | R | S | S | S | O119 | - |

|        |       |   |   |   |   |   |   |   |   |   |   |   |   |      |   |
|--------|-------|---|---|---|---|---|---|---|---|---|---|---|---|------|---|
| 4<br>7 | 42471 | R | R | S | R | R | R | R | S | R | R | S | S | O83  | - |
| 4<br>8 | 44883 | R | R | R | R | R | R | R | R | R | R | R | R | O26  | - |
| 4<br>9 | 41642 | R | R | R | S | R | R | R | S | I | S | R | S | O120 | - |
| 5<br>0 | 13019 | R | R | R | S | R | R | R | S | I | S | R | S | O26  | - |

R-resistant,I-intermediate,S-sensitive,++ clear or good lytic activity,- no activity

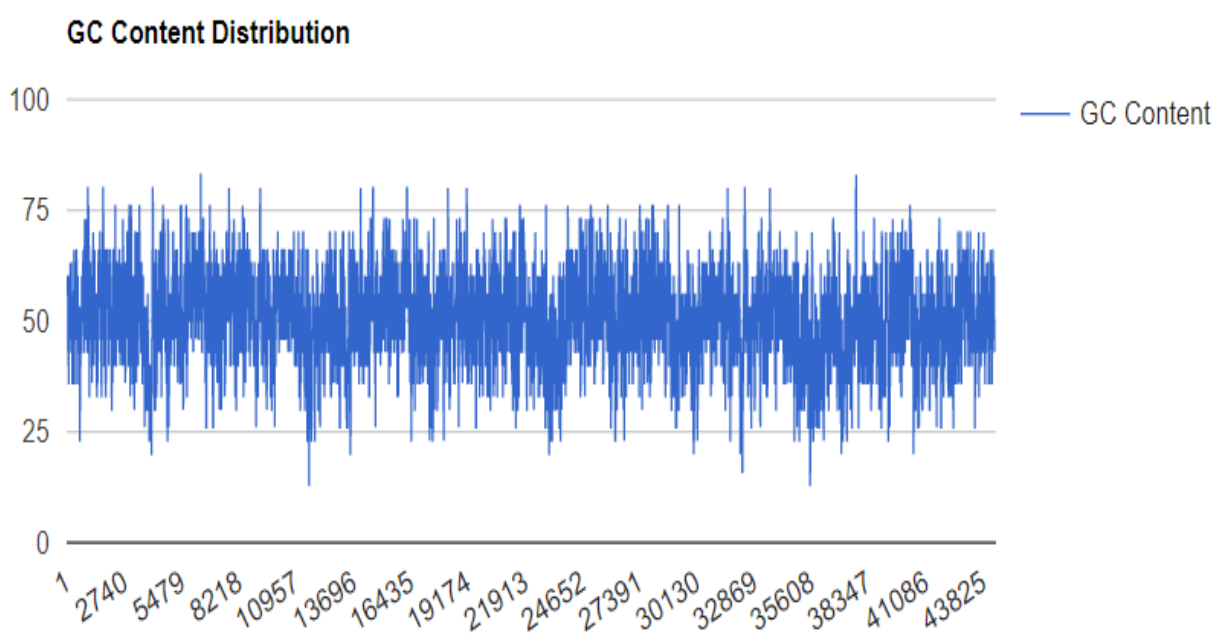

**Figure S1:** GC content distribution in the genome of phage 590B.



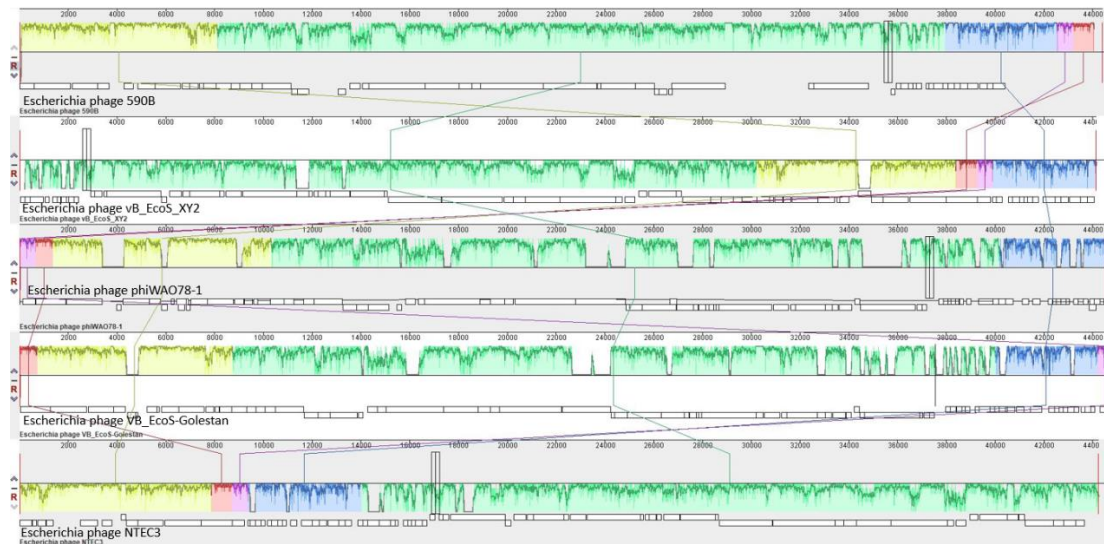

**Figure S2.** Genome comparison between phage *Escherichia* phage 590B and four related phages with Mauve 2.0. The degree of genome sequence similarity between the aligned region is indicated by the height of the similarity profile. The colored blocks are connected by lines depicting the homologous regions among 590B and four related phages.

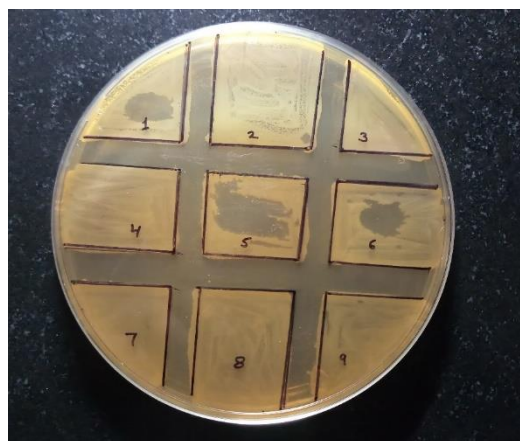

**Figure S3:** Representative image of spot assay used to test host range of phage 590B.

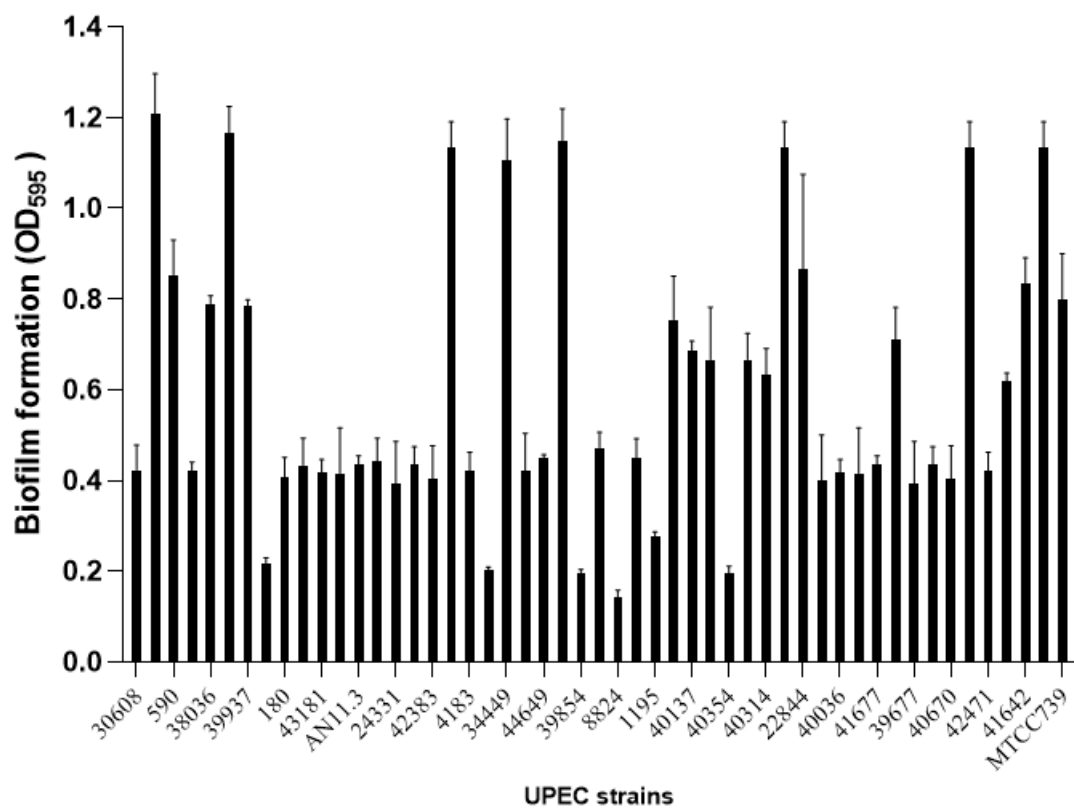

Figure S4: Biofilm formation capacity of 50 MDR, XDR UPEC strains and MTCC 739 strain in crystal violet assay.

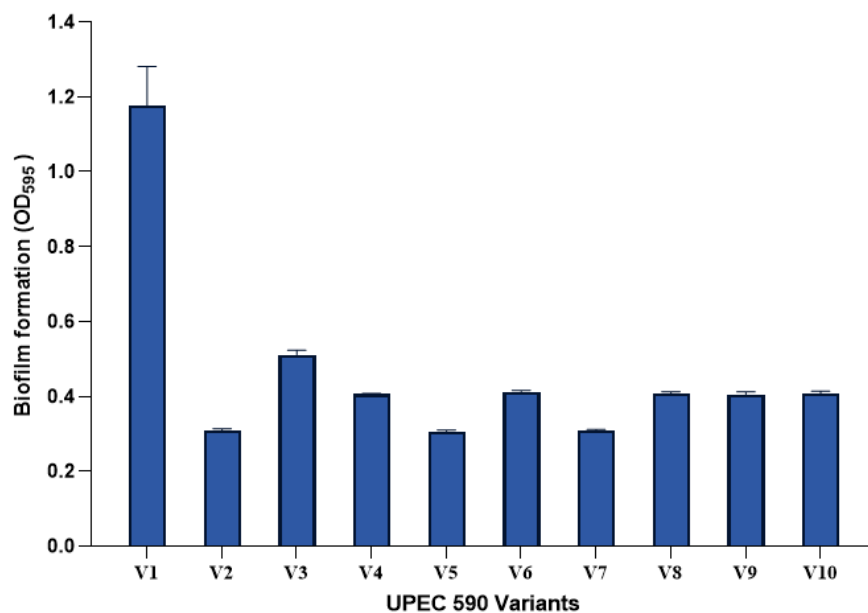

Figure S5: Biofilm-forming capacity of ten UPEC590 variants (V1-V10) in crystal violet assay.
